# Supplementary material for: Metformin attenuates myocardial ischemia-reperfusion injury via up-regulation of antioxidant enzymes
Source: PLoS One. 2017 Aug 17;12(8):e0182777. doi: 10.1371/journal.pone.0182777 (PMC5560646; doi:10.1371/journal.pone.0182777)

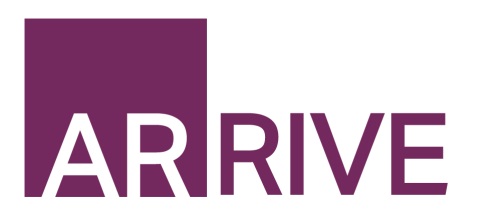


The ARRIVE Guidelines Checklist

Animal Research: Reporting In Vivo Experiments

Carol Kilkenny1, William J Browne2, Innes C Cuthill3, Michael Emerson4 and Douglas G Altman5

*1The National Centre for the Replacement, Refinement and Reduction of Animals in Research, London, UK, 2School of Veterinary Science, University of Bristol, Bristol, UK, 3School of Biological Sciences, University of Bristol, Bristol, UK, 4National Heart and Lung Institute, Imperial College London, UK, 5Centre for Statistics in Medicine, University of Oxford, Oxford, UK.*

|  | | ITEM | RECOMMENDATION | Section/ Paragraph |
| --- | --- | --- | --- | --- |
| 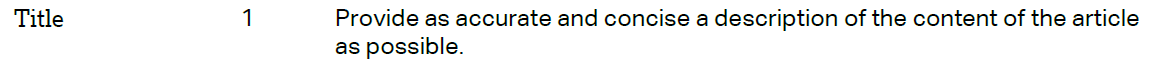 | | | Title page |
| 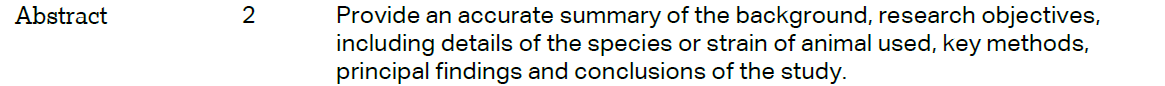 | | | Abstract/ paragraph 1 |
| INTRODUCTION | | |  |
| 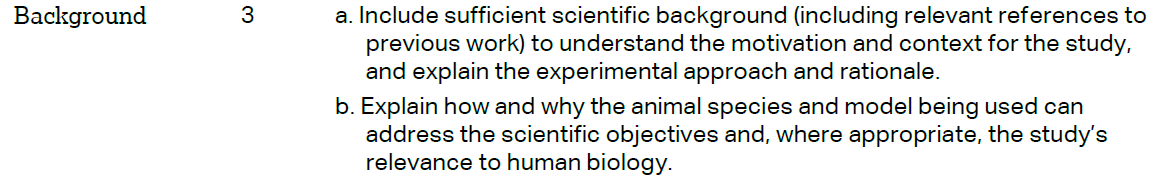 | | | Introduction/ paragraph 2-4 |
| 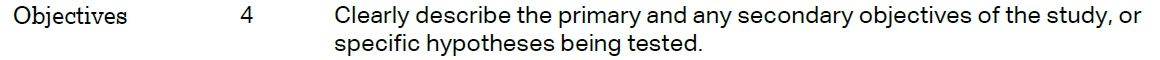 | | | paragraph 5 |
| METHODS | | |  |
| 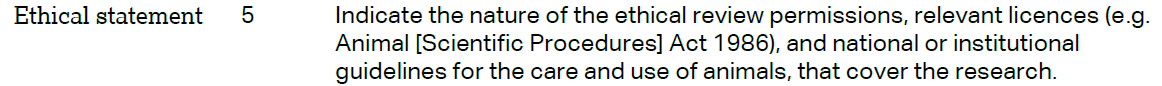 | | | Materials and Method/  paragraph 6 |
| 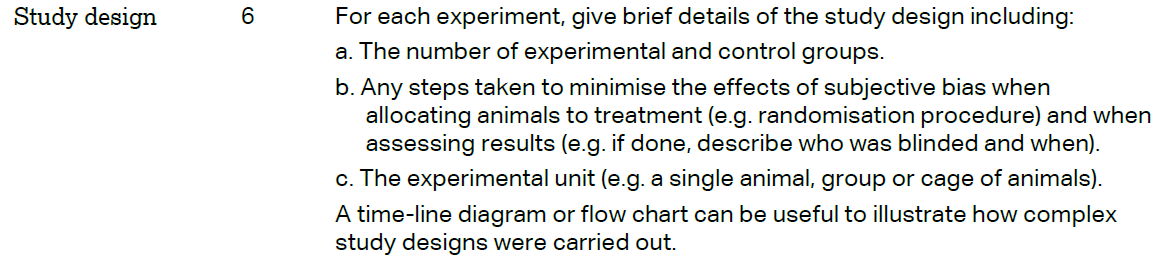 | | | Materials and Method/  paragraph 7 |
| 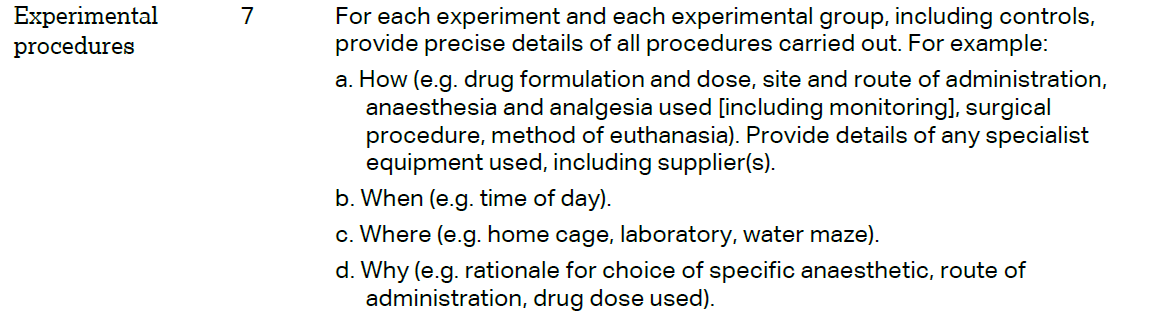 | | | Materials and Method/  paragraph 7 |
| 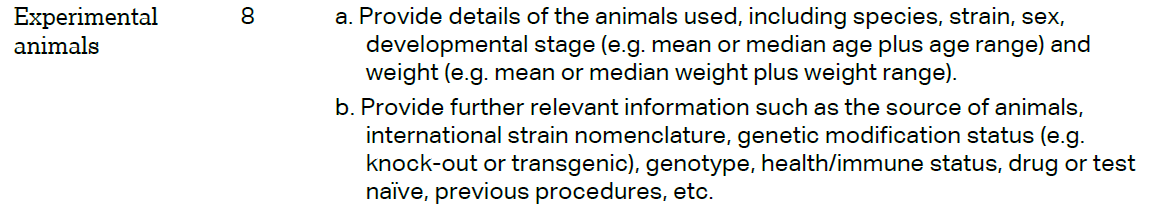 | | | Materials and Method/  paragraph 7 |

The ARRIVE guidelines. Originally published in *PLoS Biology*, June 20101

| 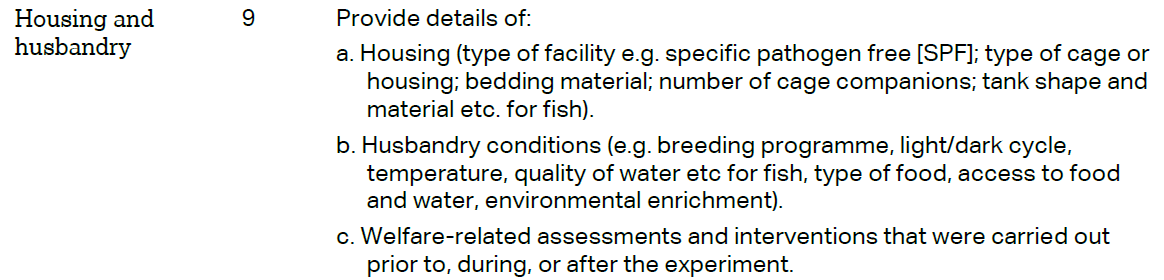 | Materials and Method/  paragraph 6 | |
| --- | --- | --- |
| 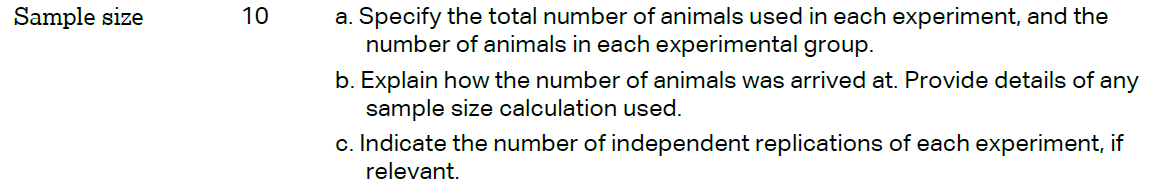 | Materials and Method/  paragraph 7 | |
| 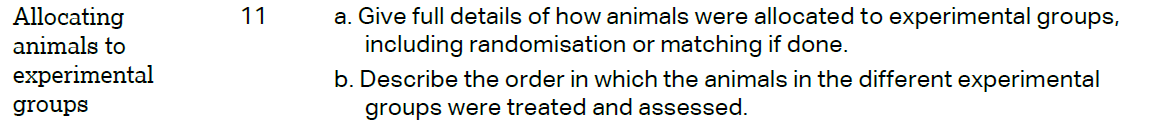 | Materials and Method/  paragraph 7 | |
| 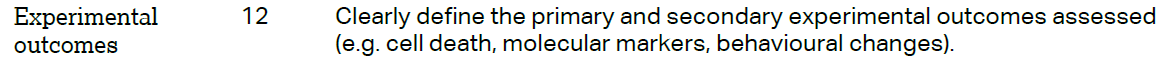 | Materials and Method/  paragraph 8-16 | |
| 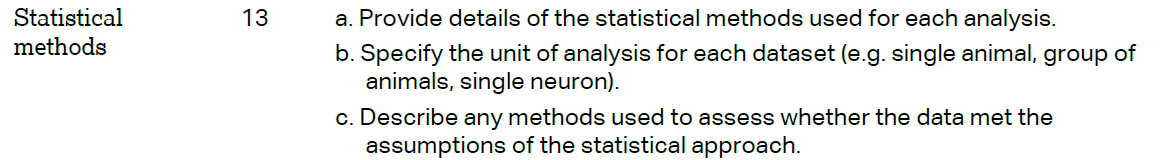 | Materials and Method/  paragraph 17 | |
| RESULTS |  | |
| 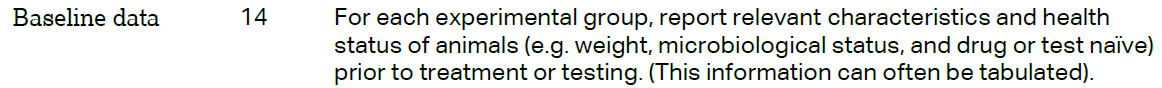 | Results and discussion/ | |
| 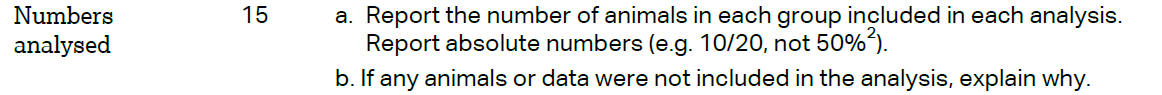 | Materials and Method/ paragraph 7 | |
| 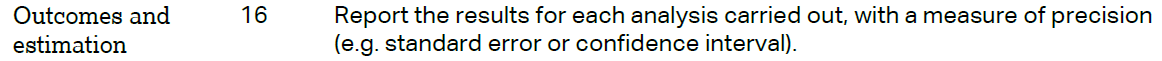 | Results and discussion/  paragraph 18-25 | |
| 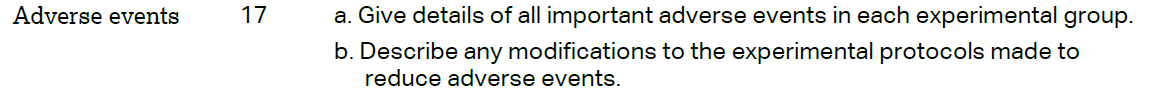 | Materials and Methods paragraph 7 | |
| DISCUSSION |  | |
| 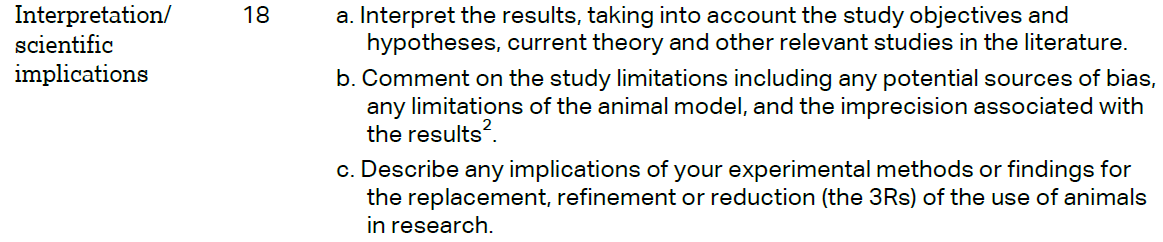 | Results and discussion/  paragraph 26-29 | |
| 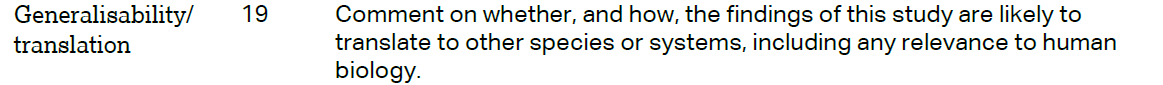 | Conclusion/  Paragraph 30 | |
| 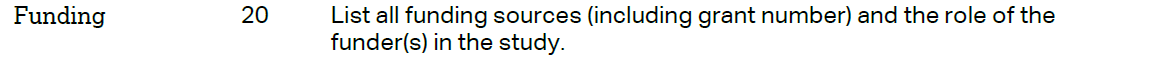 | | Funding Statement/  Paragraph 32 |


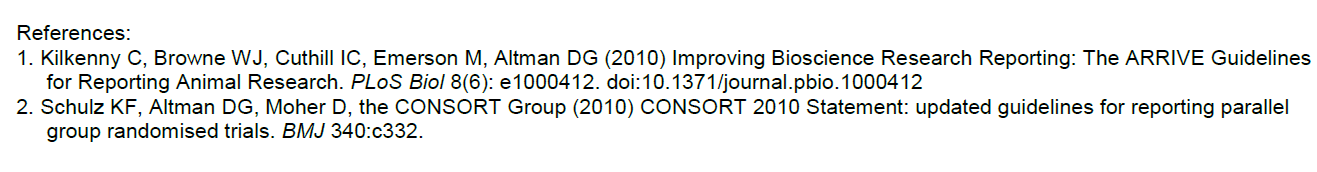

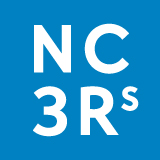

Supplement: S1 File — (DOCX) [file pone.0182777.s001.docx]
